# Supplementary material for: Comprehensive Analyses of Four PhNF-YC Genes from Petunia hybrida and Impacts on Flowering Time
Source: MDPI journal article supplement (doi:10.3390/plants13050742), 2024-03-06
Supplement: s1 [file s1]

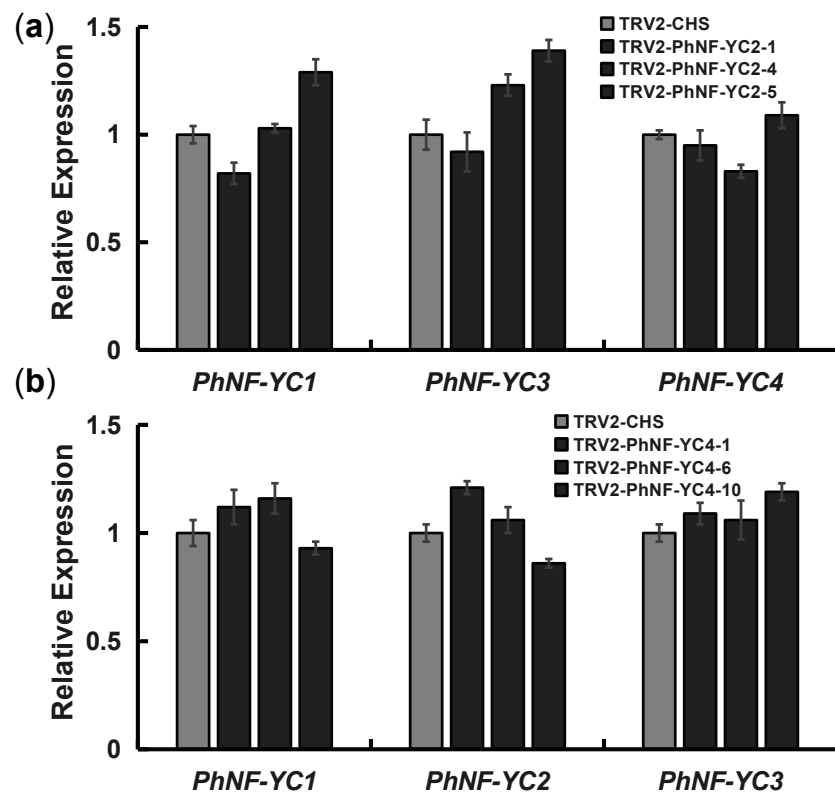

**Figure S1.** Relative expression levels of other PhNF-YCs in PhNF-YC2-silenced plants (a) and PhNF-YC4-silenced plants (b) .
